# Supplementary material for: An Integrated Regulatory Network Reveals Pervasive Cross-Regulation among Transcription and Splicing Factors
Source: PLoS Comput Biol. 2012 Jul 26;8(7):e1002603. doi: 10.1371/journal.pcbi.1002603 (PMC3405991; doi:10.1371/journal.pcbi.1002603)
Supplement: Dataset S1 — Splicing and transcription inedges for each node in the integrated regulatory network. (XLS) [file pcbi.1002603.s001.xls]

## Sheet: dataset1
		Splicing inedges	Transcription inedges
Splicing factors	Tra2alpha	0	0
	9G8	4	0
	CUG-BP	5	17
	FOX1-2	0	14
	hnRNPA1	0	7
	hnRNPAB	4	1
	hnRNPG	0	0
	hnRNPH-F	9	7
	MBNL	10	3
	NOVA1	9	39
	nPTB-PTBP1	6	5
	QKI	16	3
	SC35	6	2
	SF2ASF	6	0
	SRp20	3	4
	SRp30	0	1
	SRp40	6	0
	SRp55	3	1
	Tra2beta	4	0
	YB1	0	0
Transcription factors	AP-1	0	0
	AML1a	0	8
	AP-2	0	35
	AP-4	0	8
	AREB6	0	14
	ArntAhR	0	4
	ARP-1	0	24
	ATF-2	0	11
	ATF6	0	2
	Bach1	0	0
	Bach2	0	6
	Cart-1	0	13
	Cdc5	0	1
	CEBPalphaCHOP-10	0	18
	Chx10	0	7
	c-Myb	2	1
	c-MycMAX1	0	23
	CREB	2	0
	c-Rel	0	8
	CUTL1	0	11
	E2F-1	0	3
	EBPbeta	0	0
	Egr-1	0	10
	Egr-2	0	9
	Egr-3	0	17
	Elk-1	0	7
	ER-alpha	9	5
	FAC1	0	3
	FOXC1	0	4
	FOXD1	0	10
	FOXD3	0	25
	FOXF2	0	16
	FOXI1	0	2
	FOXJ2	0	9
	FOXL1	0	9
	FOXO1a	0	3
	FOXO3	0	13
	FOXO4	0	15
	GATA-1	0	10
	GATA-2	0	2
	GATA-3	0	13
	GATA-6	0	15
	GCNF	0	15
	GR	2	16
	Hlf	0	0
	HNF-4alpha2COUP	4	13
	HSF1	0	4
	HSF2	1	0
	IRF-1	0	5
	IRF-7A	4	13
	ITF-2	0	29
	LCR-F1	0	10
	LHX3	0	4
	Lmo2	0	6
	LUN-1	6	1
	MAZR	0	4
	MEF2	4	1
	Meis-1HOXA9B	6	26
	MRF-2	0	29
	MyoD	0	2
	MZF-1	0	16
	NCX	0	10
	NF-1	0	0
	NFAT	6	0
	NF-kappaB1RelA	0	8
	NFY	7	0
	Nkx2-2	0	13
	Nkx3-1	0	1
	Nkx6-1	0	9
	p300	0	13
	P53	0	8
	Pax-2	0	17
	Pax-5	0	2
	Pax-6	7	15
	Pbx1a	2	8
	POU2F1	0	6
	POU3F1	0	12
	POU3F2	0	12
	PPAR-gamma2	0	2
	RFX1	0	11
	RORalpha	0	16
	RP58	0	14
	RREB-1	5	2
	Sox9	0	5
	Sp1	0	9
	SREBP-1a	7	7
	SRF	0	7
	SRY	0	0
	STAT3	2	0
	STAT5	0	0
	Tal-1	0	5
	TAL1ALPHAE47	10	0
	TAL1BETAITF2	5	0
	TBP	0	4
	TCF11	4	0
	TGIF	0	17
	USF1	0	3
	YY1	0	2
	ZIC2	0	5
	ZID	0	3
Kinases	MELK	0	0
	LATS1	0	6
	LCK	0	1
	LIMK2	4	1
	LKB1	2	13
	LMR1	0	5
	LMR2	0	6
	LMR3	0	2
	LOK	0	3
	LTK	2	12
	LYN	4	0
	LZK	8	0
	MAK	4	2
	MAP2K1	0	4
	MAP2K2	6	0
	MAP2K3	5	6
	MAP2K4	0	5
	MAP2K5	0	3
	MAP2K6	0	5
	MAP2K7	0	11
	MAP3K2	0	10
	MAP3K3	0	6
	MAP3K4	2	6
	MAP3K5	0	1
	MAP3K6	0	4
	MAP3K7	0	3
	MAPKAPK2	0	3
	MAPKAPK3	0	3
	MAPKAPK5	1	1
	MARK1	2	4
	MARK2	5	0
	MARK3	4	7
	MARK4	1	3
	MAST1	0	11
	MAST2	6	2
	MAST4	0	13
	MASTL	5	6
	MER	0	0
	MET	0	8
	MISR2	0	2
	MLK1	0	3
	MLK2	0	2
	MLK3	0	6
	MLKL	0	2
	MNK1	0	3
	MNK2	3	2
	MOK	5	0
	MOS	0	3
	MPSK1	4	8
	MRCKa	0	10
	MRCKb	0	14
	MSK1	0	7
	MSK2	0	7
	MSSK1	0	14
	MST1	1	2
	MST2	0	5
	MST4	0	6
	MUSK	0	0
	MYO3A	0	4
	MYO3B	0	3
	MYT1	0	11
	NDR1	0	6
	NEK1	3	2
	NEK11	0	10
	NEK2	0	4
	NEK4	0	2
	NEK6	0	2
	NEK7	0	2
	NEK8	0	15
	NEK9	0	3
	NIM1	0	4
	NRBP1	0	0
	NuaK1	0	6
	NuaK2	0	3
	OSR1	0	8
	p38b	1	9
	p38g	0	11
	p70S6K	0	6
	PAK1	2	2
	PAK4	6	2
	PAK5	0	11
	PASK	0	1
	PBK	0	3
	PCTAIRE1	0	14
	PCTAIRE2	0	7
	PDGFRa	0	3
	PDGFRb	0	3
	PDHK1	0	3
	PDHK2	0	4
	PDHK3	0	2
	PDK1	0	5
	PFTAIRE1	0	2
	PHKg1	0	1
	PHKg2	3	5
	PIK3R4	0	2
	PIM2	0	7
	PIM3	0	12
	PINK1	0	1
	PITSLRE	11	9
	PKACa	0	16
	PKACb	0	2
	PKACg	0	8
	PKCa	0	0
	PKCe	0	17
	PKCg	0	4
	PKCh	0	2
	PKCi	0	1
	PKCt	0	1
	PKCz	10	4
	PKD2	0	0
	PKD3	0	2
	PKG1	0	7
	PKG2	0	3
	PKN2	0	8
	PKN3	0	0
	PKR	2	0
	PLK1	0	1
	PLK2	0	5
	PLK3	0	3
	PLK4	0	0
	PRKX	0	0
	PRPK	0	1
	PSKH1	0	1
	PSKH2	0	1
	PYK2	1	4
	QIK	0	5
	QSK	0	0
	RET	4	3
	RIOK1	0	1
	RIOK3	0	0
	RIPK1	4	0
	RIPK2	2	0
	RNAseL	0	0
	RON	0	0
	ROR2	0	0
	RSK3	1	0
	RSKL1	0	0
	RSKL2	2	0
	SCYL1	1	0
	SCYL2	0	0
	SgK071	0	0
	SGK2	0	0
	SgK288	0	0
	SGK3	0	0
	SgK307	3	0
	SgK396	0	0
	SgK493	0	0
	SgK495	0	0
	SgK496	0	0
	skMLCK	0	0
	SLK	5	0
	Slob	0	0
	SMG1	4	0
	smMLCK	5	0
	SRPK2	0	0
	STK33	3	0
	STLK5	2	0
	STLK6	0	0
	SYK	1	0
	TAF1	0	0
	TAK1	3	0
	TAO3	0	0
	TBCK	0	0
	TEC	2	0
	TESK2	1	0
	TGFbR1	0	0
	TGFbR2	3	0
	TIE1	0	0
	TIF1a	0	0
	TIF1g	3	0
	TLK1	4	0
	TLK2	0	0
	TNK1	0	0
	Trad	0	0
	Trb3	4	0
	Trio	7	0
	TRKA	0	0
	TRKB	0	0
	TRRAP	5	0
	Wnk3	0	10
	Wnk4	0	13
	YY1	0	0
	ZIC2	0	0
	ZID	0	0

## Sheet: dataset2
		Splicing inedges	Transcription inedges
Splicing factors	9G8	12	0
	CUG-BP	13	17
	FOX1-2	9	14
	hnRNPA1	0	7
	hnRNPAB	8	0
	hnRNPG	0	0
	hnRNPH-F	0	0
	MBNL	14	3
	NOVA1	16	39
	nPTB-PTBP1	4	5
	QKI	17	3
	SC35	13	2
	SF2ASF	13	0
	SRp20	8	0
	SRp30	0	1
	SRp40	13	0
	SRp55	6	1
	Tra2alpha	0	0
	Tra2beta	10	0
	YB1	0	0
Transcription factors	Bach1	0	0
	AML1a	0	8
	AP-1	6	0
	AP-2	0	35
	AP-4	7	8
	AREB6	0	14
	ArntAhR	5	4
	ARP-1	0	24
	ATF-2	0	11
	ATF6	2	2
	Bach2	0	6
	Cart-1	0	13
	Cdc5	0	1
	CEBPalphaCHOP-10	0	18
	Chx10	0	7
	c-Myb	7	1
	c-MycMAX1	0	23
	CREB	12	0
	c-Rel	3	8
	CUTL1	0	11
	E2F-1	0	3
	EBPbeta	0	0
	Egr-1	0	10
	Egr-2	0	9
	Egr-3	0	17
	Elk-1	0	7
	ER-alpha	1	5
	FAC1	0	3
	FOXC1	0	4
	FOXD1	0	10
	FOXD3	0	25
	FOXF2	0	16
	FOXI1	0	2
	FOXJ2	0	9
	FOXL1	0	9
	FOXO1a	0	3
	FOXO3	0	13
	FOXO4	0	15
	GATA-1	0	10
	GATA-2	0	2
	GATA-3	0	13
	GATA-6	0	15
	GCNF	0	15
	GR	0	16
	Hlf	0	0
	HNF-4alpha2COUP	0	13
	HSF1	9	4
	HSF2	4	0
	IRF-1	7	5
	IRF-7A	2	13
	ITF-2	0	29
	LCR-F1	0	10
	LHX3	0	4
	Lmo2	0	6
	LUN-1	0	1
	MAZR	0	4
	MEF2	3	1
	Meis-1HOXA9B	3	26
	MRF-2	0	29
	MyoD	0	2
	MZF-1	0	16
	NCX	0	10
	NF-1	0	0
	NFAT	5	0
	NF-kappaB1RelA	0	8
	NFY	5	0
	Nkx2-2	0	13
	Nkx3-1	0	1
	Nkx6-1	0	9
	p300	0	13
	P53	5	8
	Pax-2	0	17
	Pax-5	8	2
	Pax-6	6	15
	Pbx1a	7	8
	POU2F1	0	6
	POU3F1	0	12
	POU3F2	0	12
	PPAR-gamma2	0	2
	RFX1	5	11
	RORalpha	0	16
	RP58	0	14
	RREB-1	1	2
	Sox9	0	5
	Sp1	0	9
	SREBP-1a	4	7
	SRF	0	7
	SRY	0	0
	STAT3	5	0
	STAT5	8	0
	Tal-1	0	5
	TAL1ALPHAE47	10	0
	TAL1BETAITF2	8	0
	TBP	0	4
	TCF11	2	0
	TGIF	0	17
	USF1	4	3
	YY1	7	2
	ZIC2	0	5
	ZID	0	3
Kinases	SgK496	0	0
	LATS1	7	6
	LCK	9	1
	LIMK2	8	1
	LKB1	2	13
	LMR1	11	5
	LMR2	0	6
	LMR3	0	2
	LOK	9	3
	LTK	7	12
	LYN	4	0
	LZK	9	0
	MAK	9	2
	MAP2K1	5	4
	MAP2K2	6	0
	MAP2K3	2	6
	MAP2K4	9	5
	MAP2K5	10	3
	MAP2K6	0	5
	MAP2K7	3	11
	MAP3K2	0	10
	MAP3K3	10	6
	MAP3K4	9	6
	MAP3K5	8	1
	MAP3K6	8	4
	MAP3K7	9	3
	MAPKAPK2	0	3
	MAPKAPK3	10	3
	MAPKAPK5	7	1
	MARK1	7	4
	MARK2	10	0
	MARK3	9	7
	MARK4	9	3
	MAST1	8	11
	MAST2	10	2
	MAST4	10	13
	MASTL	7	6
	MELK	9	0
	MER	10	0
	MET	0	8
	MISR2	7	2
	MLK1	9	3
	MLK2	9	2
	MLK3	0	6
	MLKL	3	2
	MNK1	9	3
	MNK2	0	2
	MOK	9	0
	MOS	0	3
	MPSK1	5	8
	MRCKa	9	10
	MRCKb	8	14
	MSK1	9	7
	MSK2	6	7
	MSSK1	0	14
	MST1	6	2
	MST2	8	5
	MST4	9	6
	MUSK	8	0
	MYO3A	8	4
	MYO3B	9	3
	MYT1	6	11
	NDR1	8	6
	NEK1	9	2
	NEK11	8	10
	NEK2	0	4
	NEK4	6	2
	NEK6	8	2
	NEK7	0	2
	NEK8	4	15
	NEK9	9	3
	NIM1	0	4
	NRBP1	9	0
	NuaK1	0	6
	NuaK2	0	3
	OSR1	0	8
	p38b	6	9
	p38g	6	11
	p70S6K	8	6
	PAK1	6	2
	PAK4	9	2
	PAK5	0	11
	PASK	8	1
	PBK	0	3
	PCTAIRE1	8	14
	PCTAIRE2	5	7
	PDGFRa	0	3
	PDGFRb	8	3
	PDHK1	7	3
	PDHK2	8	4
	PDHK3	0	2
	PDK1	0	5
	PFTAIRE1	7	2
	PHKg1	5	1
	PHKg2	9	5
	PIK3R4	0	2
	PIM2	5	7
	PIM3	0	12
	PINK1	0	1
	PITSLRE	10	9
	PKACa	0	16
	PKACb	6	2
	PKACg	0	8
	PKCa	7	0
	PKCe	8	17
	PKCg	8	4
	PKCh	7	2
	PKCi	0	1
	PKCt	9	1
	PKCz	9	4
	PKD2	9	0
	PKD3	5	2
	PKG1	4	7
	PKG2	0	3
	PKN2	8	8
	PKN3	9	0
	PKR	5	0
	PLK1	7	1
	PLK2	0	5
	PLK3	8	3
	PLK4	7	0
	PRKX	4	0
	PRPK	0	1
	PSKH1	0	1
	PSKH2	0	1
	PYK2	10	4
	QIK	0	5
	QSK	9	0
	RET	0	3
	RIOK1	0	1
	RIOK3	8	0
	RIPK1	9	0
	RIPK2	5	0
	RNAseL	3	0
	RON	5	0
	ROR2	10	0
	RSK3	10	0
	RSKL1	8	0
	RSKL2	6	0
	SCYL1	6	0
	SCYL2	8	0
	SgK071	8	0
	SGK2	4	0
	SgK288	6	0
	SGK3	7	0
	SgK307	8	0
	SgK396	6	0
	SgK493	5	0
	SgK495	9	0
	skMLCK	7	0
	SLK	9	0
	Slob	8	0
	SMG1	10	0
	smMLCK	8	0
	SRPK2	8	0
	STK33	7	0
	STLK5	6	0
	STLK6	8	0
	SYK	8	0
	TAF1	11	0
	TAK1	7	0
	TAO3	10	0
	TBCK	7	0
	TEC	8	0
	TESK2	5	0
	TGFbR1	9	0
	TGFbR2	9	0
	TIE1	9	0
	TIF1a	9	0
	TIF1g	8	0
	TLK1	8	0
	TLK2	9	0
	TNK1	8	0
	Trad	8	0
	Trb3	0	0
	Trio	7	0
	TRKA	11	0
	TRKB	11	0
	TRRAP	10	0
	Wnk3	0	10
	Wnk4	0	13
	YY1	0	0
	ZIC2	0	0
	ZID	0	0
