# Supplementary material for: An Integrated Regulatory Network Reveals Pervasive Cross-Regulation among Transcription and Splicing Factors
Source: PubMed Central journal article supplement (PMC3405991; doi:10.1371/journal.pcbi.1002603), 2012-07-26
Supplement: pcbi.1002603.s007.pdf [file pcbi.1002603.s007.pdf]

**Table S1** : Comparing the inedge density in the integrated network versus random networks

|                                  |                       | Network | Random | Stdev (random) |
|----------------------------------|-----------------------|---------|--------|----------------|
| Splicing regulation inedges      | splicing factors      | 4       | 0.9    | 0.6            |
|                                  | transcription factors | 0.95    | 1.2    | 0.2            |
|                                  | kinases               | 1       | 1.1    | 0.1            |
| Transcription regulation inedges | splicing factors      | 5.3     | 5.2    | 1.2            |
|                                  | transcription factors | 8.3     | 5.1    | 0.5            |
|                                  | kinases               | 3.3     | 5.1    | 0.2            |
